# Supplementary material for: Alterations of Gab2 signalling complexes in imatinib and dasatinib treated chronic myeloid leukaemia cells
Source: PubMed Central journal article supplement (PMC3640961; doi:10.1186/1478-811x-11-30), 2013-04-22

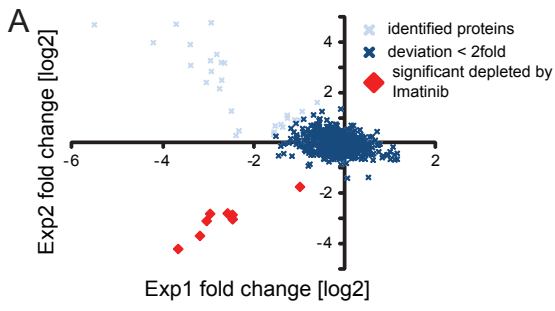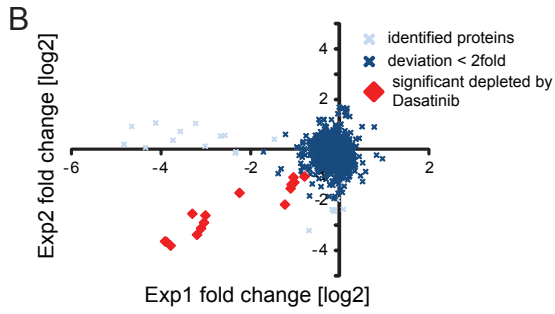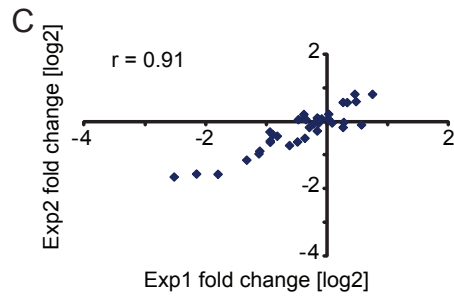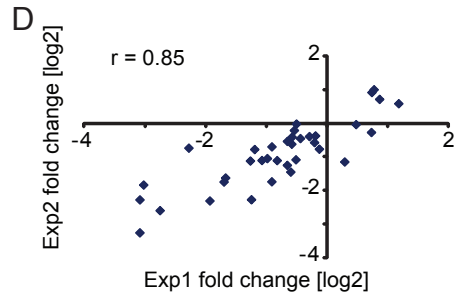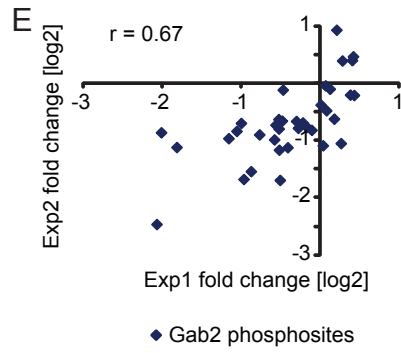

Supplement: 1478-811X-11-30-S4.pdf [file 1478-811X-11-30-S4.pdf]
